# Supplementary material for: Challenges of Integrating HIV Prevention and Treatment in China's Border Mountain Regions: A Grounded Theory Study
Source: Research Square preprint supplement (doi:10.21203/rs.3.rs-5862161/v1), 2025-04-21
Supplement: Supplementary file 1 [file 8393a0f987aed607f771d1bf.docx]

**Interview Outline on the Integration of Regional HIV Healthcare and Prevention**

HIV medical integration refers to the seamless combination of medical services and preventive measures, achieved through the interconnection and synergistic action between treatment and prevention. This integration aims to effectively curb the transmission and spread of HIV.

Greetings. We are master’s and doctoral students from the School of Medicine and Health Management, Tongji Medical College, Huazhong University of Science and Technology, and we are currently conducting a research study on the effectiveness of HIV prevention and treatment in the county. We kindly ask for your cooperation in completing a 30-minute interview based on the information we have gathered. Your participation is greatly appreciated, and we assure you that all interview content will be used solely for academic research purposes and that your personal privacy will remain confidential.

- **Interview Time:** ___________
- **Name:** ___________
- **Position and Title:** ___________
- **Length of Service:** ___________
- **Gender:** ___________
- **Work Unit:** ___________

1. Do you believe that there is any integration of medical treatment and prevention in the HIV control efforts in Lincang City? What are the primary methods used for medical treatment? What are the main approaches to prevention? How well are these medical and preventive efforts integrated?
2. What are the challenges faced in the medical treatment, prevention, and control of HIV in Lincang City, Yunnan Province? Which of these challenges do you consider the most critical? (For example, gathering of ethnic minorities, low levels of education, rising HIV prevalence, social stigmatization of HIV, etc.)
3. Is the government’s involvement in the process of HIV prevention and control adequate? This includes knowledge of relevant policies and allocation of funding.
4. What are the difficulties faced by institutions involved in HIV prevention and control? What are the key factors contributing to these difficulties?
5. What challenges do you face in your own work in providing care and treatment to HIV patients?
6. Are patients generally proactive and cooperative in the process of HIV prevention and treatment?
7. Which groups of individuals are most affected by HIV, such as men who have sex with men, migrant workers, or intravenous drug users? What specific challenges arise in preventing and controlling HIV among these populations?
8. Is there significant community and social organization involvement in the prevention and control of HIV? Are there any gaps in social participation?
9. Do you believe that the main barriers to effective HIV prevention and control are low health awareness among patients, insufficient participation by organizations, and inadequate support from society or the government?
10. What is the current status of information infrastructure for HIV prevention and control within county medical communities? Is there an informatics platform in place to collect patient data in a timely manner? Are there any areas that need improvement?

| STable 1 Challenges of prevention HIV patients in border areas | | | | | | | | |
| --- | --- | --- | --- | --- | --- | --- | --- | --- |
| **Selective Coding** | **n** | **%** | Axial Coding | n | % | **Open Coding** | **n** | **%** |
| Challenges of prevention and control of HIV patients in border areas | 221 | 39.82 | Patients do not pay attention to HIV prevention and control | 126 | 22.70 | Hidden source of infection | 14 | 2.52 |
| Infected people who do not take medication on time become one of the sources of infection | 24 | 4.32 |
| Sexual behavior becomes the main route of transmission | 13 | 2.34 |
| Men who have sex with men increased | 13 | 2.34 |
| High-risk groups do not use condoms | 11 | 1.98 |
| Migrant workers do not pay attention to disease prevention and control | 14 | 2.52 |
| Intravenous drug abuse phenomenon infection | 12 | 2.16 |
| Increased prostitution among residents | 12 | 2.16 |
| Presence of infected persons of Myanmar nationality | 13 | 2.34 |
| It is difficult for village doctors to screen at home | 34 | 6.13 | It is difficult for village doctors to carry out on-site blood tests | 34 | 6.13 |
| Poor enthusiasm for HIV prevention and treatment in hospitals | 38 | 6.85 | The effect of health education is limited | 3 | 0.54 |
| Health education is understaffed | 17 | 3.06 |
| Single form of health education | 2 | 0.36 |
| Excessive health education coverage | 16 | 2.88 |
| CDC and the government have limited responsibilities for HIV prevention and control | 7 | 1.26 | Limited central government funding support | 4 | 0.72 |
| Local governments mainly assess and supervise | 3 | 0.54 |
| The social atmosphere of HIV prevention and control is tense | 16 | 2.88 | There are a few phenomena of HIV changing hosts to retaliate against society | 13 | 2.34 |
| Social atmosphere tense | 3 | 0.54 |

| STable 2 Difficulties in the treatment of HIV patients in frontier areas | | | | | | | | |
| --- | --- | --- | --- | --- | --- | --- | --- | --- |
| **Selective Coding** | **n** | **%** | **Axial Coding** | **n** | **%** | **Open Coding** | **n** | **%** |
| Difficulties in the treatment of HIV patients in frontier areas | 277 | 49.91 | Patient's condition turns to partial difference | 37 | 6.67 | Patients with comorbidities and complications are severe | 25 | 4.50 |
| Opportunistic infection resulting in patient death | 12 | 2.16 |
| Patient's medication compliance is poor | 97 | 17.48 | Not paying attention to personal health | 2 | 0.36 |
| The patient's family support is weak, and it is difficult for the family to provide support | 19 | 3.42 |
| The patient resisted treatment and did not take medication on time | 2 | 0.36 |
| Patients are unwilling to tell their families about their illness | 3 | 0.54 |
| Personal personality is extreme and does not follow doctor's advice | 4 | 0.72 |
| Personal personality is extreme and does not follow doctor's advice | 6 | 1.08 |
| It is difficult for migrant workers to track their medication | 16 | 2.88 |
| Home address far away from medical institutions | 14 | 2.52 |
| Poor economic level, it is difficult to bear the cost of drug inspection | 13 | 2.34 |
| The results of compliance education for health care workers are poor | 18 | 3.24 |
| Poor effect of on-site HIV treatment in village clinics | 13 | 2.34 | It is difficult for village doctors to carry out on-site health follow-up | 4 | 0.72 |
| The main treatment institutions are designated medical institutions in the city | 9 | 1.62 |
| Challenges for medical staff to carry out HIV treatment | 78 | 14.05 | Healthcare workers are at high risk of exposure | 24 | 4.32 |
| Patients with comorbidities have complex physical conditions and difficult diagnosis and treatment | 17 | 3.06 |
| Few high-level diagnosis and treatment technicians | 7 | 1.26 |
| Obstructed doctor-patient communication (e.g. part-time doctors don't know the patient) | 17 | 3.06 |
| Unreasonable salary structure of doctors' work | 6 | 1.08 |
| On-the-job training crowds out the rest time of medical staff | 2 | 0.36 |
| Newly recruited medical staff working in the anti-infectious disease department | 5 | 0.90 |
| The referral mechanism is not smooth | 21 | 3.78 | The construction of inter-department information platform is not smooth | 3 | 0.54 |
| There is poor communication between medical institutions | 18 | 3.24 |
| The synergistic treatment of Chinese and Western medicine has little effect | 22 | 3.96 | Synergistic treatment of traditional Chinese and western medicine can lead to liver and kidney function damage | 22 | 3.96 |
| Limited government HIV support | 9 | 1.62 | The central government gives a small amount of special subsidies to HIV medical staff | 9 | 1.62 |

| STable 3 The dilemma of integration of HIV medical treatment and prevention in frontier areas | | | | | | | | |
| --- | --- | --- | --- | --- | --- | --- | --- | --- |
| **Selective Coding** | **n** | **%** | **Axial Coding** | **n** | **%** | **Open Coding** | **n** | **%** |
| The dilemma of integration of HIV medical treatment and prevention in frontier areas | 57 | 10.27 | Lack of close cooperation between institutions | 57 | 10.27 | The number of referrals from village clinics and township health centers is small | 2 | 0.36 |
| The number of patients referred by maternal and child health hospitals and traditional Chinese medicine is small | 23 | 4.14 |
| There is no legal binding between cooperating institutions | 17 | 3.06 |
| Loose inter-agency cooperation | 15 | 2.70 |
